# Supplementary material
Source: PubMed Central journal article supplement (PMC1413623)

**A.**

Day 0

Day 30

0

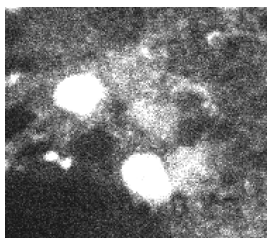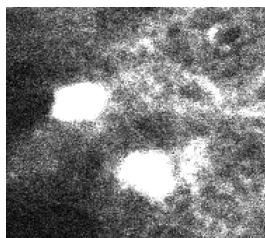

-2 μm

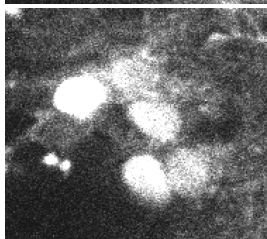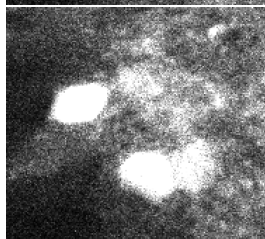

-4 μm

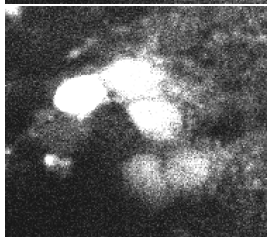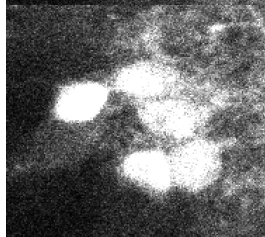

-6 μm

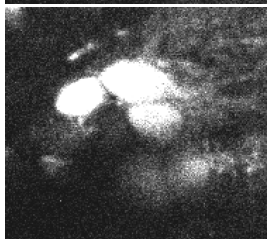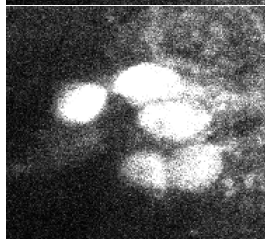

**B.**

Projection

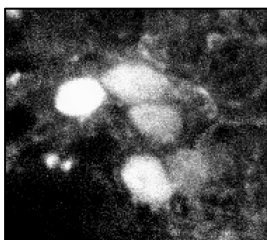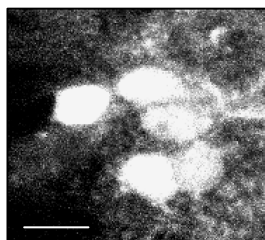

Supplement: pnas_0506297103_1.pdf [file pnas_0506297103_1.pdf]

Time after BrdU  
injection

GFP+

BrdU+

Merge

1 day

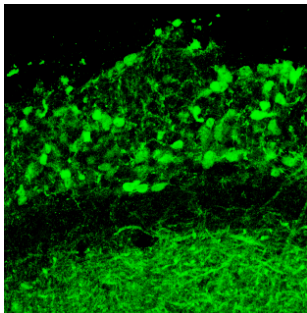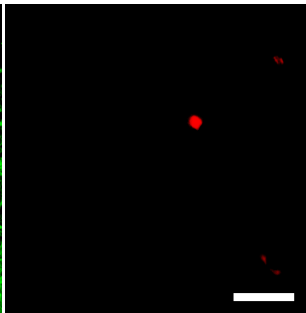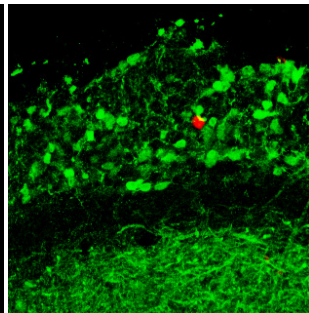

30 day

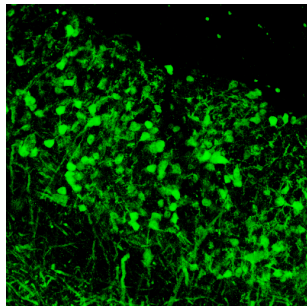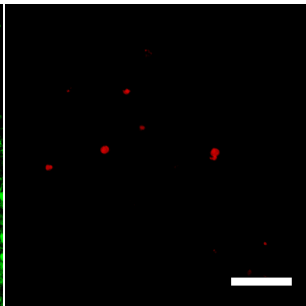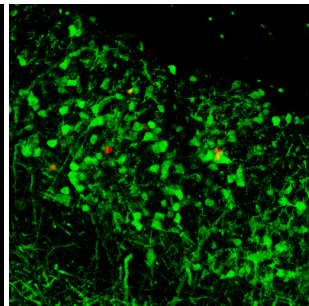

Supplement: pnas_0506297103_2.pdf [file pnas_0506297103_2.pdf]

A.

Z level

Day 0

Day 30

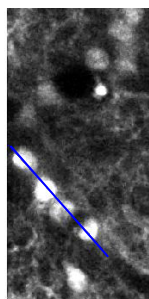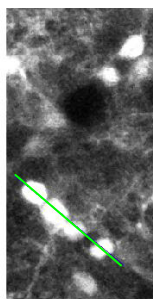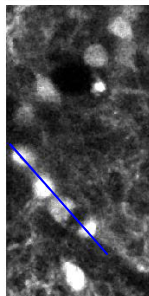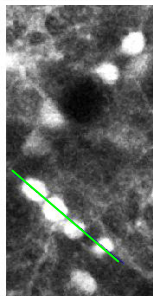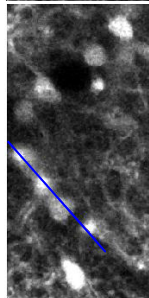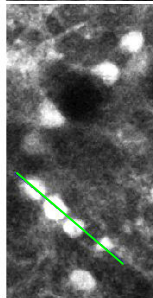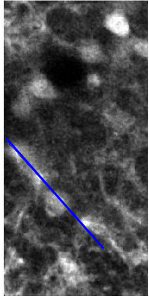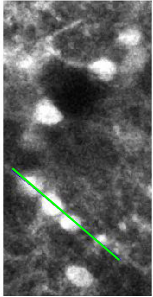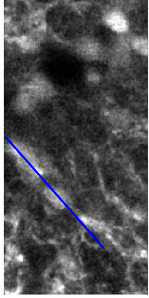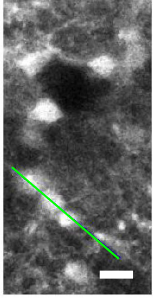

B.

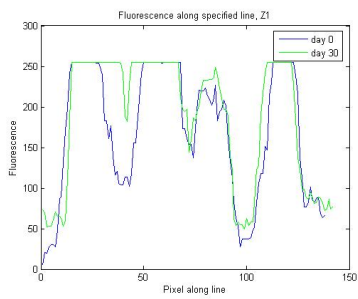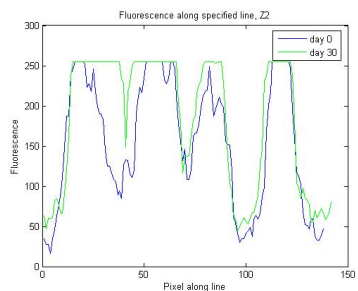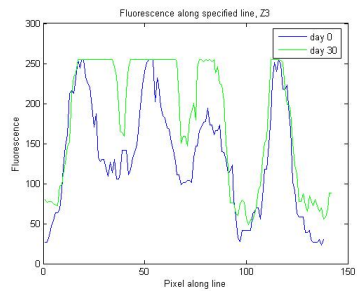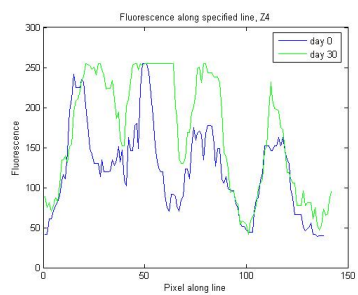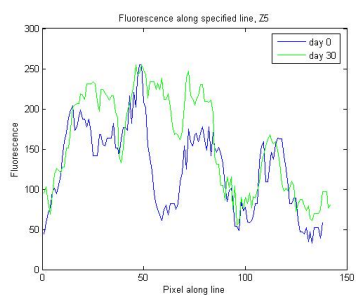

Supplement: pnas_0506297103_3.pdf [file pnas_0506297103_3.pdf]
